# Supplementary material for: High Abundance of Gut Bacteroides in Early Childhood correlates with Microbiome Stability and Resilience after Antibiotic Treatment and with Increased Risk for Childhood Infections
Source: Research Square preprint supplement (doi:10.21203/rs.3.rs-5123674/v1), 2024-12-25
Supplement: Supplementary file 1 [file 80362d713b272212b7ef4d05.docx]

**Supplementary Methods**

**Cases that were excluded due to controversial data in the symptom diaries:**

2 cases were excluded due to controversial data in the symptom diaries. Of those, one case had an incomplete symptom diary, likely because the data were not transferred completely into the database. For the other case, application of "Penicillin-Ratiopharm 125mg Suppositories" was reported. Likely Paracetamol was given.

**Treatment episodes with treatment breaks or changes of types of antibiotics:**

Five cases received treatment episodes that were paused for 1 day (2 cases), 2 days (1 case), 3 days (1 case), or 5 days (1 case). Each of those was counted as one episode.

One case received various types of antibiotics (Aminopenicillins, Cephalosporins, Aminoglycosides) for 25 days, with breaks of max. 4 days in between. This was counted as one episode with antibiotic class "other".

One case received intravenous antibiotics (antibiotic class unknown) for one day, followed by oral Cefpodoxim treatment. This was counted as one episode of Cephalosporin treatment.

One case received antibiotics for 13 days, and the type of antibiotic was only specified on days 10-13 as Amoxiclav. This was counted as one episode of Aminopenicillin treatment.

One case received Cefpodoxim for 11 days and Amoxicillin for 14 days, starting from the 5th day of Cefpodoxim (resulting in 18 days treatment in total). This was counted as one episode with antibiotic class "other".

One case received Cefaclor for 3 days and Amoxicillin for 8 days, starting from the 3rd day of Cefaclor (resulting in 10 days treatment in total). This was counted as one episode of Aminopenicillin treatment.

One case received Cefuroxim for 1 day, followed by 14 days of Cotrimoxazol. This was counted as one episode with antibiotic class "other".

One case received Kanamycin POS eye drops. Since this was a topical treatment, it was not counted as antibiotic treatment episode for this study.
